# Supplementary material for: Methylomic Analysis Identifies Frequent DNA Methylation of Zinc Finger Protein 582 (ZNF582) in Cervical Neoplasms
Source: PubMed Central journal article supplement (PMC3397950; doi:10.1371/journal.pone.0041060), 2012-07-16
Supplement: pone.0041060.s003.pdf [file pone.0041060.s003.pdf]

**Table S1. Demographic for Discovery and pre-validation phase studies**

| Histopathology          | Case Number | Age  |         |
|-------------------------|-------------|------|---------|
|                         |             | Mean | ± SD    |
| In discovery phase      |             |      |         |
| Normal                  | 19          | 46.5 | ± 12.67 |
| AC                      | 19          | 50.7 | ± 11.19 |
| SCC                     | 38          | 51.4 | ± 11.22 |
| Total                   | 76          |      |         |
| In pre-validation phase |             |      |         |
| Normal                  | 156         | 44.4 | ± 13.71 |
| CIN1                    | 55          | 42.1 | ± 9.48  |
| CIN2                    | 31          | 45.6 | ± 14.92 |
| CIN3/CIS                | 47          | 47.3 | ± 11.56 |
| SCC                     | 41          | 55.4 | ± 13.28 |
| Total                   | 330         |      |         |

Abbreviations: SD, Standard deviation; Normal, normal scrapings; AC, adenocarcinoma; SCC, squamous cervical carcinoma; CIN1, cervical intraepithelial neoplasia type 1, CIN2, cervical intraepithelial neoplasia type 2; CIN3, cervical intraepithelial neoplasia type 3; CIS, carcinoma *in situ*.
