# Supplementary material for: Methylomic Analysis Identifies Frequent DNA Methylation of Zinc Finger Protein 582 (ZNF582) in Cervical Neoplasms
Source: PubMed Central journal article supplement (PMC3397950; doi:10.1371/journal.pone.0041060), 2012-07-16
Supplement: pone.0041060.s004.pdf [file pone.0041060.s004.pdf]

Table S2. Selected 192 methylated genes in SCC and AC

| Gene name | Chr   | Strand | Refseq                | Methylated region in AC                    | Methylated region in SCC                   |
|-----------|-------|--------|-----------------------|--------------------------------------------|--------------------------------------------|
| ADAMTS20  | chr12 | -      | NM_025003             | 42231794~42232058                          | 42231494~42231958                          |
| ADARB1    | chr21 | +      | NM_015834             | 45318157~45318496                          | 45318157~45318311<br>45318367~45318496     |
| AK001533  | chr7  | +      | AK001533              | 98447664~98447918                          | 98447759~98448123                          |
| ANKRD17   | chr4  | -      | NM_198889             | 74343190~74343629<br>74343290~74343629     | 74343190~74343629                          |
| ARHGDIG   | chr16 | +      | NM_001176             | 270231~270770<br>270406~270855             | 270106~270680                              |
| ASPHD1    | chr16 | +      | NM_181718             | 29819114~29819674                          | 29819034~29819484                          |
| ATP11B    | chr3  | +      | NM_014616             | 183993987~183994151                        | 183993987~183994151                        |
| B3GALT6   | chr1  | +      | NM_080605             | 1156925~1157265                            | 1156925~1157265                            |
| B4GALNT4  | chr11 | +      | NM_178537             | 359004~359474                              | 359106~359559                              |
| BAI2      | chr1  | -      | NM_001703             | 32002042~32002486                          | 32002257~32002486                          |
| C10orf92  | chr10 | -      | NM_017609             | 134521836~134522385                        | 134522141~134522295                        |
| C19orf22  | chr19 | -      | NM_138774             | 864002~864573                              | 864122~864462                              |
| C7orf28B  | chr7  | -      | NM_198097             | 6832084~6832628                            | 6832084~6832443                            |
| CACNG8    | chr19 | +      | NM_031895             | 59157320~59157774<br>59157620~59157774     | 59157515~59157774                          |
| CADM3     | chr1  | +      | NM_021189             | 157407348~157408108<br>157407543~157408408 | 157407543~157407892<br>157408059~157408408 |
| CASP9     | chr1  | -      | NM_001229             | 15723533~15723982                          | 15723833~15723982                          |
| CBFA2T3   | chr16 | -      | NM_175931             | 87535340~87536001<br>87535655~87536001     | 87535140~87535389                          |
| CBLN1     | chr16 | -      | BC093692              | 47873142~47873491                          | 47872962~47873411                          |
| CBLN2     | chr18 | -      | <b>BC035789</b>       | <b>68361755~68362009</b>                   | <b>68361070~68361909</b>                   |
| CD7       | chr17 | -      | NM_006137             | 77868872~77869326                          | 77868972~77869326                          |
| CGREF1    | chr2  | -      | NM_006569             | 27195200~27195849                          | 27195610~27195771                          |
| CHAD      | chr17 | -      | NM_001267             | 45901090~45901434                          | 45901090~45901339                          |
| CNOT6     | chr5  | +      | NM_015455             | 179853829~179854093                        | 179853929~179854493                        |
| CNOT6L    | chr4  | -      | NM_144571             | 78959355~78960102                          | 78959545~78960202                          |
| COL18A1   | chr21 | +      | NM_130445             | 45649336~45649878                          | 45648728~45649275                          |
| COX8C     | chr14 | +      | NM_182971             | 92883198~92883942                          | 92883198~92883942                          |
| CSPG5     | chr3  | -      | NM_006574             | 47594935~47595474                          | 47594836~47595474                          |
| CTCFL     | chr20 | -      | NM_080618             | 55533670~55534331<br>55533977~55534136     | 55533977~55534231                          |
| CTDSPL    | chr3  | +      | NM_005808             | 37878667~37878916                          | 37878157~37878291                          |
| CX36      | chr15 | -      | NM_020660             | 32834156~32834599                          | 32833860~32834205                          |
| CXCL14    | chr5  | -      | NM_004887             | 134942482~134942836                        | 134942482~134942951                        |
| CXorf40B  | chrX  | -      | NM_00101384           | 148857626~148858170                        | 148858012~148858170<br>148857706~148858170 |
| DNMT3L    | chr21 | -      | NM_175867             | 44506343~44506878                          | 44506537~44506993                          |
| DOCK6     | chr19 | -      | NM_020812             | 11234164~11234401                          | 11234164~11234306                          |
| ECAT11    | chr1  | +      | NM_019079             | 62433031~62433275                          | 62432531~62433185                          |
| EML3      | chr11 | -      | NM_153265             | 62136237~62136983                          | 62136237~62136983                          |
| ESRRA     | chr11 | +      | BC092470              | 63829442~63830306<br>63830047~63830496     | 63829442~63830306<br>63830257~63830411     |
| EXD3      | chr9  | -      | FLJ20433              | 139437582~139438226                        | 139437667~139437931<br>139436867~139437631 |
| F8A1      | chrX  | +      | BC039693<br>NM_012151 | 153766132~153767681                        | 154263538~154264501                        |
| FAM100A   | chr16 | -      | NM_145253             | 4604515~4604779                            | 4604515~4604779                            |
| FAM91A2   | chr1  | +      | XM_930235             | 147842673~147842822                        | 147842673~147842822                        |
| FLJ36070  | chr19 | -      | AK131427              | 53914749~53915118                          | 53914664~53915198                          |

Table S2. Selected 192 methylated genes in SCC and AC

| Gene name | Chr   | Strand | Refseq      | Methylated region in AC                    | Methylated region in SCC                   |
|-----------|-------|--------|-------------|--------------------------------------------|--------------------------------------------|
| FOXF2     | chr6  | +      | NM_001452   | 1334254~1334688                            | 1334154~1334989                            |
| GNAQ      | chr9  | -      | NM_002072   | 79835716~79836075                          | 79835826~79836075<br>79835716~79836075     |
| GNB1      | chr1  | -      | NM_002074   | 1812269~1812438<br>1812389~1812638         | 1811990~1812438<br>1812969~1813128         |
| GRAMD1A   | chr19 | +      | NM_020895   | 40183007~40183459                          | 40183303~40183534                          |
| GSTZ1     | chr14 | +      | NM_001513   | 76856814~76857059                          | 76856609~76857269                          |
| GYG2      | chrX  | +      | U94364      | 2757470~2757714<br>2757470~2757914         | 2757665~2758019                            |
| HPCA      | chr1  | +      | NM_002143   | 33124008~33124934                          | 33124008~33124533<br>33124189~33124834     |
| HSPG2     | chr1  | -      | NM_005529   | 22136448~22137106                          | 22136657~22137106                          |
| IDI1      | chr10 | +      | BC057827    | 1092776~1093140                            | 1093091~1093245                            |
| IRAK1     | chrX  | -      | NM_001569   | 152938679~152938838                        | 152938679~152938838                        |
| KBTBD9    | chr2  | +      | AL834515    | 23638368~23638507                          | 23638368~23638507                          |
| KIF1A     | chr2  | -      | NM_004321   | 241408528~241408780                        | 241408338~241409085                        |
| L3MBTL    | chr20 | +      | NM_015478   | 41576211~41576660                          | 41576111~41576660                          |
| LOC38945  | chr7  | +      | NM_203393   | 5077964~5078727<br>5078079~5078508         | 5078079~5078727<br>5078159~5078627         |
| LOC38963  | chr12 | -      | NM_00101298 | 8440516~8440670                            | 8440516~8440670                            |
| LRP3      | chr19 | +      | NM_002333   | 38377053~38377197<br>38377053~38377489     | 38376738~38377489<br>38377053~38377694     |
| LRRFIP1   | chr2  | +      | NM_004735   | 238264797~238265347                        | 238264597~238265449                        |
| MGC26718  | chr18 | +      | NM_00102999 | 14168300~14169069<br>14168300~14169249     | 14168300~14169645<br>14168300~14169755     |
| MGC50273  | chr2  | -      | NM_214461   | 132275706~132276378<br>132275906~132276280 | 132276121~132276476                        |
| MPP3      | chr17 | -      | NM_001932   | 39265957~39266286                          | 39265756~39266201                          |
| MPST      | chr22 | +      | NM_021126   | 35744678~35745517                          | 35745288~35745517                          |
| MRPL23    | chr11 | +      | NM_021134   | 1924215~1924742<br>1924300~1924742         | 1924415~1924657                            |
| NCOR2     | chr12 | -      | AK127788    | 123386915~123387562                        | 123387128~123387562                        |
| NOXA1     | chr9  | -      | NM_017820   | 139437582~139438226                        | 139437667~139437931<br>139436867~139437631 |
| NQO2      | chr6  | +      | NM_000904   | 2944533~2944882                            | 2944638~2944882                            |
| NRG1      | chr8  | +      | NM_013962   | 31616734~31617058                          | 31616734~31617058<br>31616624~31617268     |
| NT5DC3    | chr12 | -      | NM_016575   | 102758907~102759156                        | 102758907~102759156                        |
| OXT       | chr20 | +      | NM_000915   | 3000072~3000336                            | 3000182~3000816                            |
| PELI3     | chr11 | +      | NM_145065   | 65990881~65991345                          | 65991076~65991245                          |
| PIWIL1    | chr12 | +      | NM_004764   | 129387879~129388637                        | 129388268~129388522                        |
| PNMT      | chr17 | +      | NM_002686   | 35077644~35077868<br>35077734~35077868     | 35077644~35077868<br>35077644~35078168     |
| PODN      | chr1  | +      | NM_153703   | 53300476~53300845                          | 53300273~53300640                          |
| PODXL2    | chr3  | +      | NM_015720   | 128830674~128831013                        | 128830674~128831013                        |
| POMT2     | chr14 | +      | NM_013382   | 76856814~76857059                          | 76856609~76857269                          |
| PRG2      | chr19 | -      | NM_024888   | 772845~773095                              | 772845~773500<br>772845~773095             |
| PUS1      | chr12 | +      | BC009505    | 130979949~130980613                        | 130979844~130979998                        |
| RCOR2     | chr11 | -      | NM_173587   | 63440933~63441690                          | 63441043~63441292<br>63441043~63441187     |
| RIMS4     | chr20 | -      | NM_182970   | 42872431~42872880                          | 42872146~42872480                          |
| ROM1      | chr11 | -      | NM_000327   | 62136237~62136983                          | 62136237~62136983                          |

Table S2. Selected 192 methylated genes in SCC and AC

| Gene name | Chr   | Strand | Refseq                | Methylated region in AC                    | Methylated region in SCC                   |
|-----------|-------|--------|-----------------------|--------------------------------------------|--------------------------------------------|
| RPS21     | chr20 | +      | NM_001024             | 60395433~60395768                          | 60394918~60395282<br>60395433~60395768     |
| SDF4      | chr1  | +      | NM_016176             | 1156925~1157265                            | 1156925~1157265                            |
| SENP6     | chr6  | +      | NM_015571             | 76368652~76368906                          | 76368062~76368511                          |
| SLC16A3   | chr17 | +      | NM_004207             | 77779798~77780252<br>77779903~77780252     | 77779903~77780252                          |
| SORCS2    | chr4  | +      | NM_020777             | 7245084~7245443                            | 7244974~7245338                            |
| SOX8      | chr16 | +      | NM_014587             | 971101~971445                              | 970487~971445                              |
| SSTR4     | chr20 | +      | NM_001052             | 22964041~22964290                          | 22963821~22964375                          |
| TAF4      | chr20 | -      | NM_003185             | 60074382~60074611                          | 60074562~60074822                          |
| TBL1X     | chrX  | +      | NM_005647             | 9392748~9392989                            | 9392748~9392989                            |
| TCEA2     | chr20 | +      | NM_198723             | 62158106~62158440                          | 62158106~62158335                          |
| TCF7L1    | chr2  | +      | NM_031283             | 85213755~85213999<br>85213950~85214214     | 85213855~85214114                          |
| TEX28     | chrX  | -      | NM_001586             | 153176932~153177581<br>153177337~153177581 | 153176932~153177216                        |
| TITF1     | chr14 | -      | NM_003317             | 36059117~36059362                          | 36059117~36059682                          |
| TKTL1     | chrX  | -      | NM_012253             | 153176932~153177581<br>153177337~153177581 | 153176932~153177216                        |
| TMEM151B  | chr6  | +      | NM_00103970           | 44346056~44346890                          | 44346146~44346399                          |
| TMEM178   | chr2  | +      | NM_152390             | 39745797~39746346                          | 39745797~39746261<br>39745997~39746659     |
| TMEM32    | chrX  | -      | NM_173470             | 134884030~134884604<br>134884134~134884604 | 134883850~134884389                        |
| TNFRSF13C | chr22 | -      | NM_052945             | 40652503~40653256                          | 40652503~40652662<br>40652413~40652662     |
| TRIM17    | chr1  | -      | NM_016102             | 226670954~226671384<br>226670954~226671599 | 226670653~226671188<br>226670653~226671278 |
| TRIOBP    | chr22 | +      | NM_007032             | 36472007~36472436                          | 36472187~36472436                          |
| TYRO3     | chr15 | +      | NM_006293             | 39638132~39638686<br>39638132~39638861     | 39638027~39638962                          |
| WDR26     | chr1  | -      | NM_025160             | 222688910~222689159<br>222689030~222689159 | 222688124~222689159                        |
| XPO4      | chr13 | -      | AB051508              | 20374828~20375277                          | 20374743~20375187<br>20374743~20375187     |
| ZBTB7A    | chr19 | -      | BC084568<br>NM_015898 | 4018395~4018947                            | 4016404~4016638<br>4017991~4018841         |
| ZNF582    | chr19 | -      | NM_144690             | 61596953~61597511<br>61597158~61597511     | 61596953~61597511<br>61597252~61597404     |
| ZYX       | chr7  | +      | NM_003461             | 142788593~142788848                        | 142788593~142788753                        |

AC, adenocarcinoma; SCC, squamous cervical carcinoma; Chr, chromosome; Strand, the direction of transcription; +, the mRNA is transcribed from 5' to 3' direction; -, the mRNA is transcribed from 3' to 5' direction; Refseq, the NCBI RefSeq accession.
