# Supplementary material for: Methylomic Analysis Identifies Frequent DNA Methylation of Zinc Finger Protein 582 (ZNF582) in Cervical Neoplasms
Source: PubMed Central journal article supplement (PMC3397950; doi:10.1371/journal.pone.0041060), 2012-07-16
Supplement: pone.0041060.s005.pdf [file pone.0041060.s005.pdf]

Table S3. The summary of polymerase chain reaction primers

| Primer Name    | Forward Primer Sequence (5' – 3') | Reward Primer Sequence (5' – 3') | PCR SIZE (bp) | Annealing Temperature (°C) |
|----------------|-----------------------------------|----------------------------------|---------------|----------------------------|
| <b>QRT-PCR</b> |                                   |                                  |               |                            |
| ADARB1_QR01    | GCGATCCTTCCACCTCAACCTTCC          | TTTTGGTCCGTAGCTGTCCTCTTG         | 96            | 60                         |
| ANKRD17_QR01   | CAGTAGCAAGTCCTAAGCGTG             | CCAGTAAACTCCCGAATAGCATT          | 151           | 60                         |
| B3GACT6_QR01   | GCGCTTCGACACCGAATAC               | CGTACACGTAGGACAGGCG              | 158           | 60                         |
| BAI2_QR01      | ACAACCGAGATGAGATATGGTGA           | GTCAGGGAACACACGCTCC              | 152           | 60                         |
| CASP9_QR01     | GCGACCTGACTGCCAAGAAA              | TCACAATCTTCTCGACCGACA            | 180           | 60                         |
| CRYGD_QR01     | CCAGCCAGCCATGGGGAAGAT             | CCGAGTTGCAGCGGCTCAAGT            | 116           | 60                         |
| CSPG5_QR01     | GAGCTGACTTACCCATTTTCAGG           | CAGGGTGGTTCTCTGAGGTTT            | 151           | 60                         |
| DBC1_QR01      | GTGTACGCTGTCGCCACAA               | TCCCCAAAACCCATTCTCATTAC          | 113           | 60                         |
| ESRRA_QR01     | CACTATGGTGTGGCATCCTGT             | CGTCTCCGCTTGGTGATCTC             | 116           | 60                         |
| FOXF2_QR01     | CGCCTCGCCTTACCTCAAG               | CGTTCTGGTGCAAGTAGCTC             | 122           | 60                         |
| GAPDH_QR01     | ACCCACTCCTCCACCTTTGACG            | TCTCTTCCTCTTGTGCTCTTG            | 185           | 60                         |
| GNAQ_QR01      | TGGGTCAGGATACTCTGATGAAG           | TGTGCATGAGCCTTATTGTGC            | 144           | 60                         |
| GSTZ1_QR01     | ATTTCTGACCTCATCGCTGGT             | CTCCAGGGCGTTAAAGCCA              | 126           | 60                         |
| HPCA_QR01      | GCGATGGCACCATAGACTTTC             | GTCCATTTGGCGGAAGATTTTC           | 245           | 60                         |
| KIF1A_QR01     | CCGGGAAATGAGCCGTGAC               | GGTGTGCGACCAGTAGGAG              | 130           | 60                         |
| L3MBTL_QR02    | GATTCCGCAGGAAGATTTCCA             | TTGCACCTTACCTCGTCTTTG            | 255           | 60                         |
| LINGO1_QR01    | GAACCGCATCAAACGCTCAA              | AAGACGCCTAGCGGGATGA              | 177           | 60                         |
| LRP3_QR01      | ATCTTTCTCACCGGGAGACTC             | GGGCTGTAGATGACCCAC               | 101           | 60                         |
| MPP3_QR01      | GGCGTCGCTGTTCCACATA               | CCAGGCTGGTTCATACAGAT             | 160           | 60                         |
| MPST_QR01      | TTCGACATCGACCAGTGCAG              | CGTACTCCGCGAAATGCTC              | 79            | 62                         |

Table S3. The summary of polymerase chain reaction primers

| Primer Name                           | Forward Primer Sequence (5' – 3') | Reward Primer Sequence (5' – 3') | PCR SIZE (bp) | Annealing Temperature (°C) |
|---------------------------------------|-----------------------------------|----------------------------------|---------------|----------------------------|
| MRPL23_QR01                           | CCCACAACCTTCGGGTGTTCC             | CCACGGGCACGTTATAGATG             | 155           | 60                         |
| MSI1_QR01                             | GGA CTCAGTTGGCAGACTACG            | CTGGTCCATGAAAGTGACGAA            | 138           | 60                         |
| NKX2-1_QR01                           | CTCAGCCGCCGCCGAATCA               | CCGCCCTCCATGCCCACTT              | 113           | 60                         |
| NT5DC3_QR01                           | CAGACCTTGACTGGCTTATTGG            | GGTCATTTCTCGCATCTCCTTC           | 108           | 60                         |
| PDE8B_QR01                            | AACTCGCTGATCTGCCCAAAA             | CTGGCATAGTAAACCCCTGC             | 106           | 62                         |
| PELI3_QR01                            | ACCAATGGAGTCCTGGTGATG             | AGGTCGATGAGAGAGCCGTC             | 185           | 60                         |
| POMT2_QR01                            | TTCTGTGCATTCCTTGGCTCC             | AGAGTGAGGCATCCCGTGT              | 128           | 60                         |
| RBM35B_QR01                           | CGACTTAATCCTCCTAGTTTGGC           | GCACGAACCAGCGATTTGT              | 81            | 60                         |
| SDF4_QR01                             | GAGGCCATGGAGGAGAGCAAGACACA        | AACCTCCTTCTCGCTATGGCCTTTAC       | 123           | 60                         |
| SRD5A2_QR01                           | CACAGGACATTTGTGTACTCACT           | GTGTACCACCCATCAGGGTAT            | 149           | 60                         |
| SYNGR2_QR01                           | GACGCGTATTTCCCCAGATCAGC           | TCACAGAGTCGGCCCCCACCAG           | 172           | 60                         |
| TCF7L1_QR01                           | ACTATTTGCGCGAAGTGAGAAG            | GGGGTCCGTTGGAGAGGTA              | 120           | 60                         |
| TST_QR01                              | TCCCTGCTCAAGACCTACGAG             | GCCCGAGTCCAGTCCTACT              | 132           | 60                         |
| WDR26_QR01                            | CCTGGAGGCACTTCAAGTTCT             | GCTTTTGCACGTAGGTCTTCT            | 120           | 60                         |
| ZNF582_QR01                           | ATGTCCCTTGGGTCAGAATTGT            | TTGCCTTGCTCTAGGAAGGAG            | 185           | 60                         |
| ZYX_QR01                              | TCTCCCGCGATCTCCGTTT               | CCGGAAGGGATTCACTTTGGG            | 102           | 60                         |
| <b>Methylation Specific PCR (MSP)</b> |                                   |                                  |               |                            |
| ADARB1_MS04                           | ACGAAGGCGGGTAGAGTTTTTTTAGTC       | CTCCCTCACGACCACCTACGAC           | 174           | 61                         |
| ANKRD17_MS01                          | GCGTTCGCGGGGTTTTAGATTC            | CTCTTTCCTCGCTATTTCCCGCA          | 188           | 62                         |
| B3GALT6_MS02                          | TCGGTTTGTTTTGTTTTCGGGAATTC        | CCTCCCGCCTTAAACTAAAACATCGTC      | 106           | 59                         |
| CASP9_MS01                            | GGTTTTGGAGATGCGTTCGGAGGC          | CTTCCACCAACCGCAACCGAC            | 216           | 60                         |

Table S3. The summary of polymerase chain reaction primers

| Primer Name  | Forward Primer Sequence<br>(5' – 3') | Reward Primer Sequence<br>(5' – 3') | PCR SIZE<br>(bp) | Annealing<br>Temperature<br>(°C) |
|--------------|--------------------------------------|-------------------------------------|------------------|----------------------------------|
| CBFA2T3_MS03 | GAAAGTTCGGTTGATTGAGGGTTAGC           | CACCCACCCTAAACCCTACAACG             | 210              | 58                               |
| CBFA2T3_MS06 | TCGTGAGTCGGTTTTGGGTTTGC              | CTTCCTAAAAAAAAACAATAACCCTTCG        | 134              | 60                               |
| COL2A1       | GGGAAGATGGGATAGAAGGGAATAT            | AACAATTATAAACTCCAACCACCAAAC         | 91               | 60                               |
| CRYGD_MS02   | GTTTTTTTTTCGGGGTTTTTTTTTGTGC         | TAAAAAAAACCTCCGAAATCCCGAAACG        | 187              | 60                               |
| CSPG5_MS03   | GTTATGGCGGGTTTGGTTGTGC               | CAAAACCTAACAAAAAACGAAACCGA          | 113              | 60                               |
| ESRRA_MS01   | GTTGCGGGGCGGGATTTGTAC                | AAAATAAAACCGACCGTACGCAT             | 158              | 61                               |
| GNAQ_MS01    | GGTGGGCGCGGATAGGGTC                  | TCACCGAAATATCCCCGCAACGA             | 116              | 61                               |
| GNB1_MS01    | GGTTTTTCGGGGTAGCGGTATTC              | CGAAAAACCCCACGCGCTC                 | 175              | 61                               |
| KIF1A_MS02   | GGTTTAGAGCGGGGGTAGGTGGAC             | CGAAAAATAAAAAACCGACACCCGA           | 209              | 58                               |
| KIF1A_MS06   | TGGGACGGTGGAGGGAGGAC                 | CAAATCACACGCCGCTCGAA                | 129              | 58                               |
| L3MBTL_MS03  | TTTTGTCGTAGTTTAGCGTCGGGTC            | AACCCCGCCCCATAACTACGA               | 160              | 62                               |
| LINGO1_MS02  | GGATTGTCGGGCGGAGGTGTC                | ACCGCCTAACTCACCTACATCTCGAA          | 152              | 60                               |
| LRP3_MS04    | GGTTGGTGCGTAGAGTTGTTTAGTATTC         | CCGAATACCGCCGATAAAACGTC             | 207              | 58                               |
| MPP3_MS04    | GGGATTTAGGGAGCGGGAGAGC               | TCCCGAACCCCTCCCTACGAC               | 202              | 64                               |
| MPST_MS03    | GTTAGAGGGGGATTTTGCGTCTGTTT           | CCCCTCAAACCCCCGCGAAT                | 120              | 64                               |
| NKX2-1_MS02  | ATTCGGGATAGTTTTCGGGAGGTAGTC          | GTCAAAAAACACCTCTACTCCCCGC           | 112              | 60                               |
| NKX2-1_MS13  | GGGTGTTGGGGTTGTGATGTTTTT             | AACAAACCTAATATCCCTAACCTCGC          | 96               | 58                               |
| NT5DC3_MS09  | TAGTTTTAGAAGGTAGGACGAAGGTGC          | CCCACGCCCAACCTACTACGA               | 153              | 61                               |
| PDE8B_MS01   | GAGGTTTCGGCGGGGGGTATC                | CCGCTACCACCTACAATAAAAAACGAC         | 112              | 61                               |
| PELI3_MS04   | AGGGAGTTTTTTAGACGGAGTGGAGAGC         | CCAAACTCCGCCTCTTACGACGAT            | 136              | 60                               |
| POMT2_MS06   | GGAATTTTCGAGTTTTAGCGGGTAGC           | CAAACCGACAACGACTCCCGACAT            | 92               | 68                               |

Table S3. The summary of polymerase chain reaction primers

| Primer Name                               | Forward Primer Sequence (5' – 3') | Reward Primer Sequence (5' – 3') | PCR SIZE (bp) | Annealing Temperature (°C) |
|-------------------------------------------|-----------------------------------|----------------------------------|---------------|----------------------------|
| RBM35B_MS01                               | GTTTTGGCGGTTTTTTTTTAAGGTTTTTC     | ACCCACGCCCTCTCCAAACG             | 91            | 60                         |
| SDF4_MS01                                 | AGGTTTTCGTGTTCGCGTTTGTTTTTC       | CGCAACGTAATCCGCAACACGTA          | 140           | 68                         |
| SSTR4_MS06                                | GGGATTTTCGGGAGGGTCGGAC            | CACCCCAACTCCTAAAAATCAACGC        | 178           | 60                         |
| SYNGR2_MS03                               | GATTTTTTTTTGGTTCGTGTTGCGGTC       | GACTCCACCCGCCGAAAACGTA           | 203           | 59                         |
| TCF7L1_MS04                               | TTTCGTAGGGGGTAGTGTCGTTTCGTTTC     | ACGCCACCCCTCCGCAT                | 117           | 66                         |
| WDR26_MS08                                | TATGTACGTTTCGGTTTCGGAGGGC         | CCCATCCACGACCCCGACT              | 129           | 60                         |
| ZYX_MS03                                  | GTCGGAGGCGTATAGGGGTTGC            | CGAATACCCGAAATCTAACTCACCGTC      | 101           | 61                         |
| <b>Unmethylation Specific PCR (U-MSP)</b> |                                   |                                  |               |                            |
| PDE8B_UM04                                | TGTGTGTTTTTTTTGTTTGGGGAGGAAGA     | CCAACCTATATATCCACCACTCCATC       | 126           | 60                         |
| <b>Bisulfited Sequencing PCR (BS-PCR)</b> |                                   |                                  |               |                            |
| PDE8B_BS01                                | GAAAGTGGGGAAAGAAGGTGTAGGT         | CTAAAAACRCAACCCATCCCTC           | 464           | 60                         |
